# Supplementary material for: Association of Dietary Fiber, Composite Dietary Antioxidant Index and Risk of Death in Tumor Survivors: National Health and Nutrition Examination Survey 2001–2018
Source: MDPI journal article supplement (doi:10.3390/nu15132968), 2023-06-29
Supplement: s1 [file s1]

**Supplementary Table S1.**

**Weighted multivariable-adjusted hazard ratios between dietary fiber classification and all-cause mortality and tumor mortality in subgroups of tumor survivors.**

| Character                  | <25 | 25-29            | P.val            | >=29             | P.val | P.val for trend | P.val for interaction |
|----------------------------|-----|------------------|------------------|------------------|-------|-----------------|-----------------------|
| <b>All-cause mortality</b> |     |                  |                  |                  |       |                 |                       |
| Alcohol consumption        |     |                  |                  |                  |       |                 | 0.305                 |
| No                         | ref | 0.84(0.19,3.82)  | 0.822            | 0.18(0.03,1.00)  | 0.050 | 0.297           |                       |
| Yes                        | ref | 0.41(0.21,0.79)  | <b>0.009</b>     | 0.66(0.34,1.29)  | 0.226 | <b>0.008</b>    |                       |
| Smoking                    |     |                  |                  |                  |       |                 | 0.116                 |
| No                         | ref | 0.94(0.43,2.04)  | 0.874            | 0.59(0.24,1.43)  | 0.239 | 0.547           |                       |
| Yes                        | ref | 0.22(0.09,0.56)  | <b>0.002</b>     | 0.66(0.26,1.63)  | 0.362 | <b>0.007</b>    |                       |
| Hypertension               |     |                  |                  |                  |       |                 | 0.465                 |
| No                         | ref | 0.38(0.15,0.98)  | <b>0.046</b>     | 0.39(0.14,1.11)  | 0.076 | 0.612           |                       |
| Yes                        | ref | 0.46(0.23,0.93)  | <b>0.032</b>     | 0.71(0.34,1.51)  | 0.375 | <b>0.027</b>    |                       |
| Diabetes                   |     |                  |                  |                  |       |                 | 0.751                 |
| No                         | ref | 0.38(0.23,0.64)  | <b>&lt;0.001</b> | 0.58(0.28,1.22)  | 0.148 | <b>0.001</b>    |                       |
| Yes                        | ref | 0.65(0.17,2.54)  | 0.527            | 0.67(0.25,1.80)  | 0.424 | 0.370           |                       |
| <b>Cancer mortality</b>    |     |                  |                  |                  |       |                 |                       |
| Alcohol consumption        |     |                  |                  |                  |       |                 | 0.648                 |
| No                         | ref | 1.07(0.12, 9.87) | 0.948            | 0.14(0.01, 2.32) | 0.164 | 0.500           |                       |

|              |     |                 |       |                 |              |              |       |
|--------------|-----|-----------------|-------|-----------------|--------------|--------------|-------|
| Yes          | ref | 0.48(0.21,1.07) | 0.072 | 0.33(0.11,1.00) | 0.051        | <b>0.021</b> |       |
| Smoking      |     |                 |       |                 |              |              | 0.225 |
| No           | ref | 0.99(0.36,2.74) | 0.979 | 0.23(0.05,1.06) | 0.060        | 0.537        |       |
| Yes          | ref | 0.29(0.08,1.06) | 0.060 | 0.36(0.10,1.31) | 0.120        | <b>0.026</b> |       |
| Hypertension |     |                 |       |                 |              |              | 0.772 |
| No           | ref | 0.73(0.26,2.09) | 0.556 | 0.43(0.08,2.33) | 0.324        | 0.500        |       |
| Yes          | ref | 0.41(0.15,1.10) | 0.076 | 0.27(0.09,0.83) | <b>0.023</b> | <b>0.009</b> |       |
| Diabetes     |     |                 |       |                 |              |              | 0.774 |
| No           | ref | 0.60(0.28,1.30) | 0.193 | 0.29(0.08,1.09) | 0.067        | <b>0.06</b>  |       |
| Yes          | ref | 0.24(0.03,2.05) | 0.186 | 0.48(0.11,2.15) | 0.334        | 0.218        |       |

Data are hazard ratio (95% CI)

Models are adjusted for age, sex, ethnicity, education, BMI, except the subgroup variable itself.

Abbreviations:

CI, confidence interval

CDAI, composite dietary antioxidant index

BMI, body mass index

Supplementary Table S2.

Weighted multivariable-adjusted hazard ratio between CDAI quartile and all-cause mortality and tumor mortality in subgroups of tumor survivors.

| Character                  | Q1  | Q2               | P.val        | Q3              | P.val | Q4               | P.val        | P.val for trend | P.val for interaction |
|----------------------------|-----|------------------|--------------|-----------------|-------|------------------|--------------|-----------------|-----------------------|
| <b>All-cause mortality</b> |     |                  |              |                 |       |                  |              |                 |                       |
| Alcohol consumption        |     |                  |              |                 |       |                  |              |                 | 0.615                 |
| No                         | ref | 1.07(0.42,2.69)  | 0.890        | 0.81(0.34,1.92) | 0.616 | 0.69(0.24,2.03)  | 0.491        | 0.405           |                       |
| Yes                        | ref | 0.52(0.31,0.89)  | <b>0.016</b> | 0.72(0.41,1.26) | 0.252 | 0.47(0.29,0.78)  | <b>0.004</b> | <b>0.021</b>    |                       |
| Smoking                    |     |                  |              |                 |       |                  |              |                 | 0.406                 |
| No                         | ref | 0.62(0.31,1.21)  | 0.159        | 1.07(0.58,1.95) | 0.832 | 0.50(0.28,0.92)  | <b>0.025</b> | 0.107           |                       |
| Yes                        | ref | 0.56(0.29,1.06)  | 0.076        | 0.60(0.30,1.19) | 0.142 | 0.52(0.26,1.06)  | 0.070        | 0.102           |                       |
| Hypertension               |     |                  |              |                 |       |                  |              |                 | 0.880                 |
| No                         | ref | 0.47(0.21,1.03)  | 0.059        | 0.77(0.35,1.70) | 0.512 | 0.54(0.26,1.13)  | 0.102        | 0.269           |                       |
| Yes                        | ref | 0.60(0.34,1.05)  | 0.074        | 0.74(0.40,1.35) | 0.318 | 0.49(0.28,0.87)  | <b>0.015</b> | <b>0.035</b>    |                       |
| Diabetes                   |     |                  |              |                 |       |                  |              |                 | 0.374                 |
| No                         | ref | 0.65(0.34,1.24)  | 0.187        | 0.95(0.56,1.63) | 0.858 | 0.56(0.34,0.92)  | <b>0.022</b> | 0.071           |                       |
| Yes                        | ref | 0.42(0.19,0.95)  | <b>0.037</b> | 0.40(0.16,1.01) | 0.054 | 0.42(0.21,0.82)  | <b>0.012</b> | <b>0.028</b>    |                       |
| <b>Cancer mortality</b>    |     |                  |              |                 |       |                  |              |                 |                       |
| Alcohol consumption        |     |                  |              |                 |       |                  |              |                 | 0.324                 |
| No                         | ref | 1.15(0.25, 5.30) | 0.855        | 1.18(0.25,5.56) | 0.832 | 1.49(0.30, 7.44) | 0.618        | 0.623           |                       |

|              |     |                  |       |                  |              |                  |                   |                  |       |
|--------------|-----|------------------|-------|------------------|--------------|------------------|-------------------|------------------|-------|
| Yes          | ref | 0.45(0.19,1.07)  | 0.069 | 0.69(0.29,1.64)  | 0.399        | 0.38(0.20,0.72)  | <b>0.003</b>      | <b>0.034</b>     |       |
| Smoking      |     |                  |       |                  |              |                  |                   |                  | 0.818 |
| No           | ref | 0.52(0.16,1.68)  | 0.273 | 0.97(0.33,2.88)  | 0.959        | 0.51(0.18,1.48)  | 0.213             | 0.384            |       |
| Yes          | ref | 0.51(0.17,1.55)  | 0.229 | 0.64(0.23,1.80)  | 0.394        | 0.41(0.17,0.98)  | <b>0.045</b>      | 0.116            |       |
| Hypertension |     |                  |       |                  |              |                  |                   |                  | 0.555 |
| No           | ref | 0.36(0.10,1.24)  | 0.103 | 0.83(0.27,2.55)  | 0.744        | 0.57(0.19,1.66)  | 0.297             | 0.604            |       |
| Yes          | ref | 0.56(0.19,1.65)  | 0.292 | 0.69(0.25,1.93)  | 0.481        | 0.38(0.17,0.88)  | <b>0.024</b>      | 0.064            |       |
| Diabetes     |     |                  |       |                  |              |                  |                   |                  | 0.057 |
| No           | ref | 0.64(0.27,1.51)  | 0.304 | 1.38(0.63,3.06)  | 0.419        | 0.68(0.35,1.31)  | 0.245             | 0.705            |       |
| Yes          | ref | 0.31(0.08, 1.20) | 0.089 | 0.13(0.03, 0.60) | <b>0.010</b> | 0.15(0.07, 0.33) | <b>&lt;0.0001</b> | <b>&lt;0.001</b> |       |

Data are hazard ratio (95% CI)

Models are adjusted for age, sex, ethnicity, education, BMI, except the subgroup variable itself.

Abbreviations:

CI, confidence interval

CDAI, composite dietary antioxidant index

BMI, body mass index
